# Supplementary material
Source: publisher site journal article supplement (https://www.spandidos-publications.com/2651/downloadSupplementary)

Figure S1. RT-qPCR results confirming that transfection with miR-9-5p inhibitor decreased the expression of miR-9-5p compared with a miR-9-5p negative control group in the absence of any other treatment. Replicates = 3; one-way ANOVA and Tukey's multiple comparison test were used for data analysis. \*\*P<0.01. RT-qPCR, reverse transcription quantitative polymerase chain reaction; res, resistant; miR-9, microRNA-9-5p.

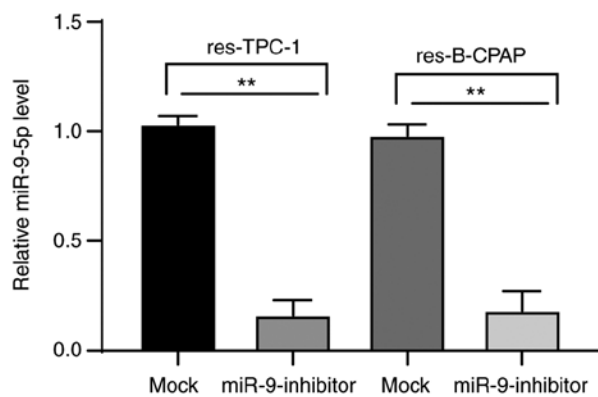

Supplement: Supplementary file 1 [file downloadSupplementary]
